# Supplementary material for: In situ growth of a 2D assisted passivation layer enabling high-performance and stable 2D/3D stacked perovskite photodetectors for visible light communication applications
Source: Royal Society of Chemistry journal article supplement (doi:10.1039/d2tc00587e), 2022-01-01
Supplement: d2tc00587e1.pdf [file d2tc00587e1.pdf]

# In-Situ Growth of 2D Assisted Passivation layer Enable High-performance and Stable 2D/3D Stacked Perovskite Photodetectors for Visible Light Communication Applications

Tengteng Li,<sup>‡</sup> Qingyan Li,<sup>‡</sup> Haijian Zhang, Hongliang Zhao, Silei Wang, Mengyao Li, Xin Tang, Xin Ding,\* Yating Zhang,\* Jianquan Yao\*

Key Laboratory of Opto-Electronics Information Technology, Ministry of Education, School of Precision Instruments and Opto-Electronics Engineering, Tianjin University, Tianjin 300072, China

<sup>‡</sup>This authors contributed equally to this work

**Table S1** The parameters of PL lifetime by fitting the TRPL spectra of BAAc-PSK, BAI-PSK and 3D-PSK films.

| Samples  | $\tau_1$ (ns) | $A_1$ (%) | $\tau_2$ (ns) | $A_2$ (%) |
|----------|---------------|-----------|---------------|-----------|
| BAAc-PSK | 77.59         | 2.3       | 815.09        | 97.7      |
| BAI-PSK  | 38.87         | 10.80     | 490.17        | 89.20     |
| 3D-PSK   | 23.38         | 20.54     | 322.34        | 79.46     |

---

\* Corresponding author.

E-mail addresses: dingxin@tju.edu.cn; yating@tju.edu.cn; jqyao@tju.edu.cn

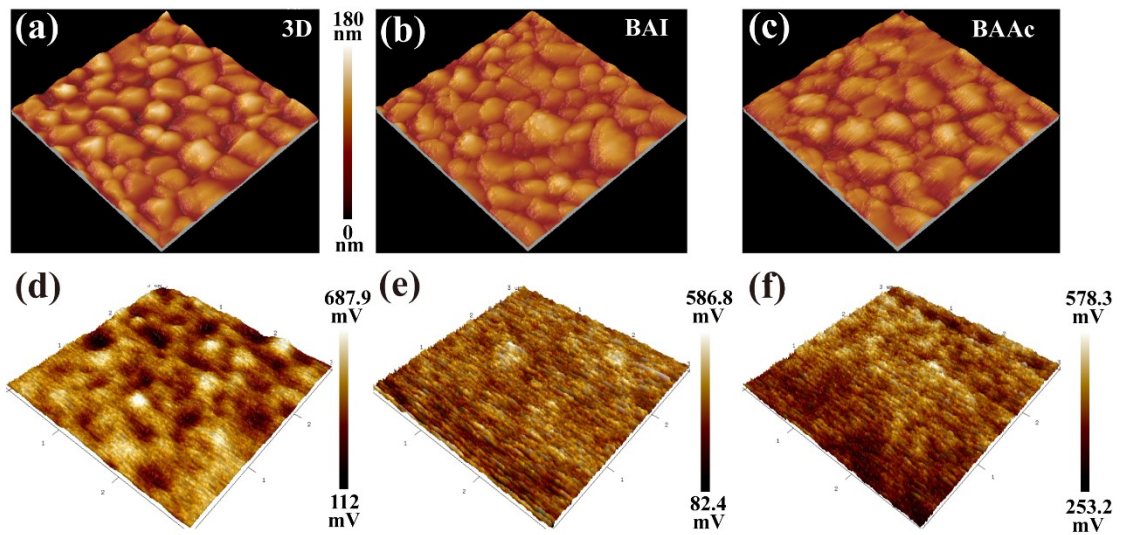

**Fig. S1** (a–c) 3D AFM images of 3D-PSK, BAI-PSK and BAAc-PSK films. (d–f) 3D CPD mappings of 3D-PSK, BAI-PSK and BAAc-PSK films.

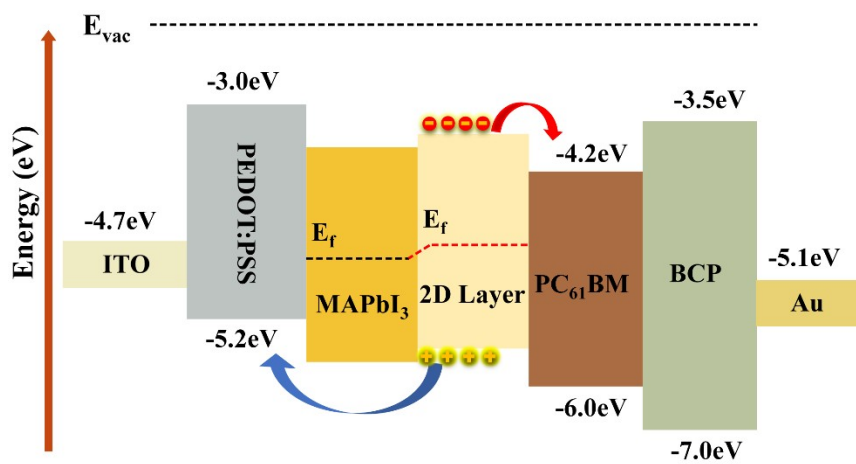

**Fig. S2** Energy level diagram of 2D/3D stacked PPDs.

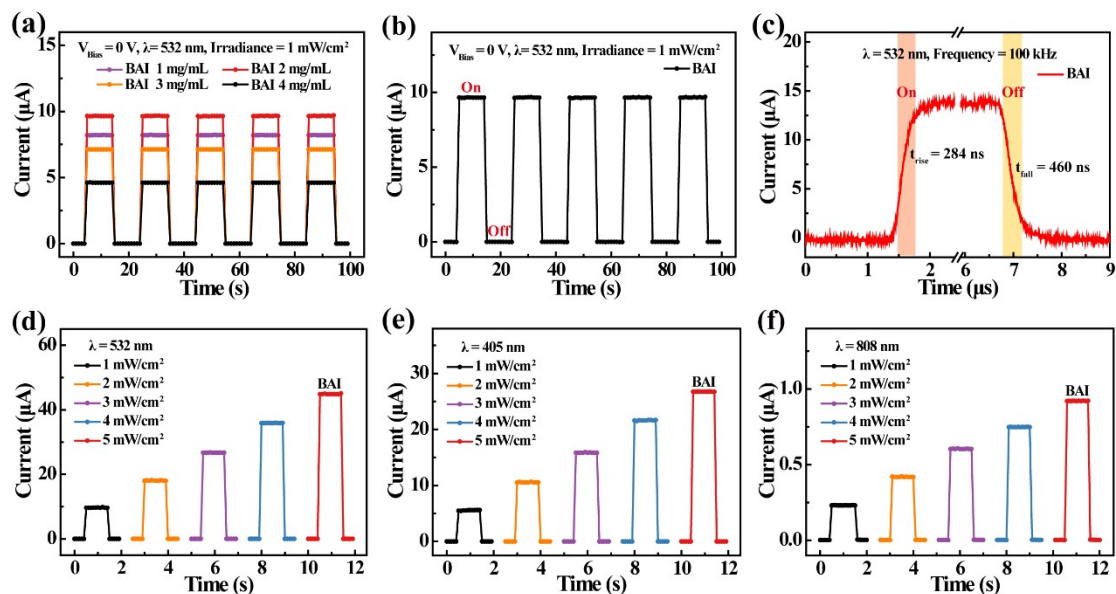

**Fig. S3** (a) Photocurrent response of 2D/3D PPDs treated with different concentrations of BAI under 532 nm light illumination with a power density of  $1 \text{ mW cm}^{-2}$ . (b) Photoswitching characteristic of the BAI-PPD under the periodic illumination of 532 nm laser. (c) Temporal photocurrent response during one ON/OFF illumination switching at a pulse frequency of 100 kHz. (d–f) Photocurrent responses of the BAI-PPD illuminated by 532, 405 and 808 nm lasers at different power densities.

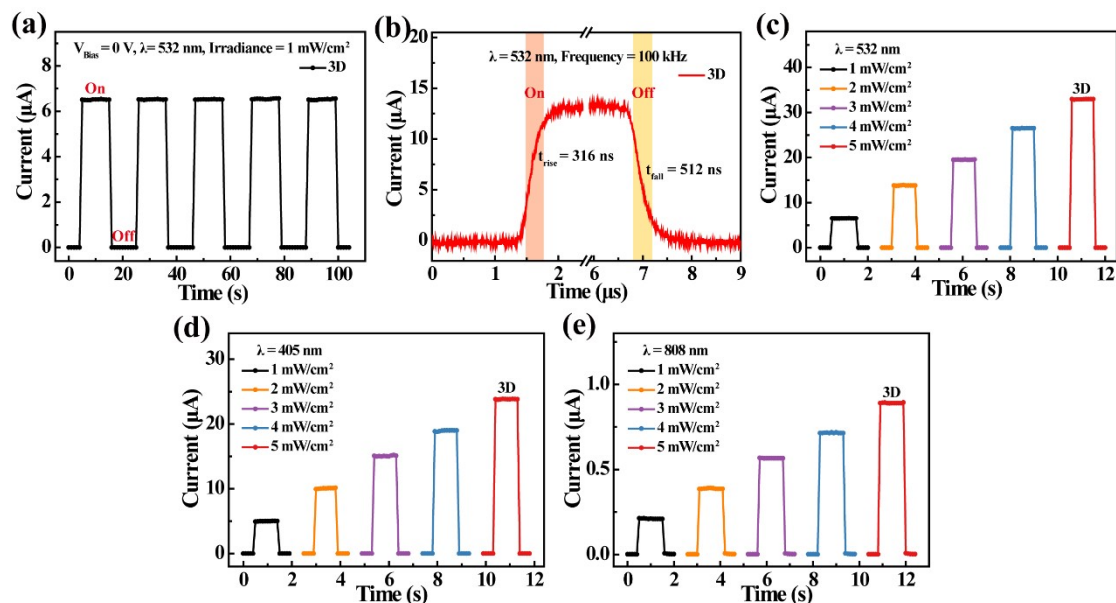

**Fig. S4** (a) Photoswitching characteristic of the 3D-PPD under the periodic illumination of 532

nm laser. (b) Temporal photocurrent response during one ON/OFF illumination switching at a pulse frequency of 100 kHz. (c–e) Photocurrent responses of the 3D-PPD illuminated by 532, 405 and 808 nm lasers at different power densities.

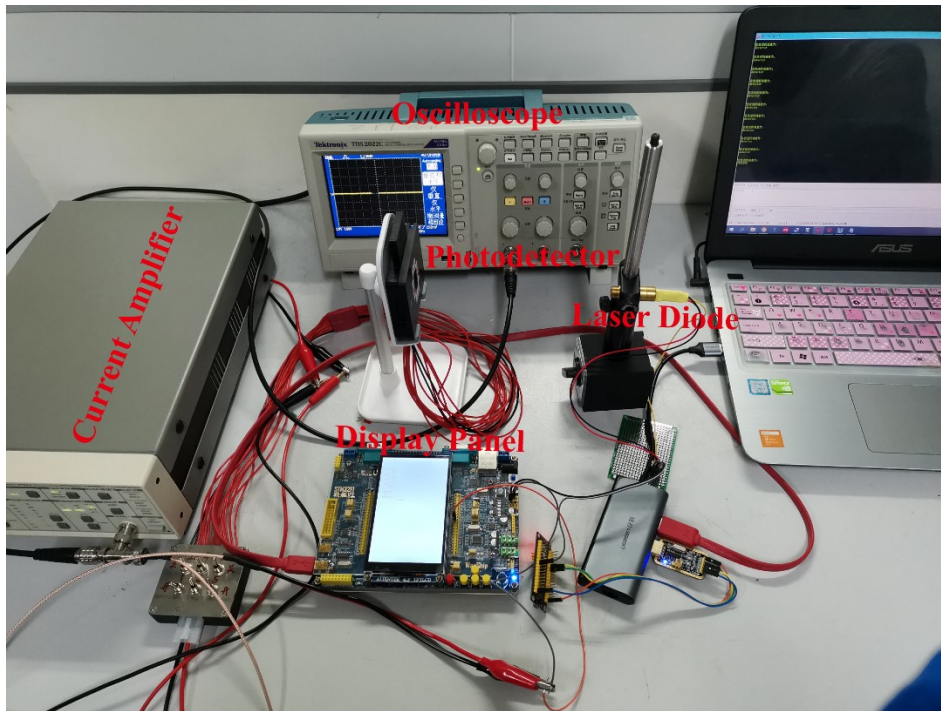

**Fig. S5** The photograph of the visible light communication system (see Video 1).

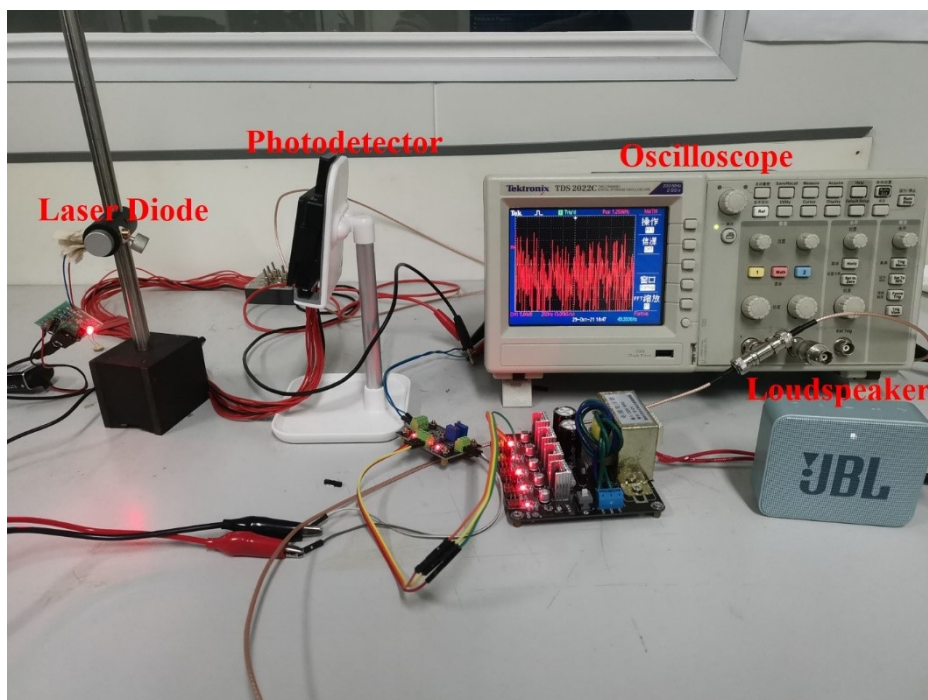

**Fig. S6** The photograph of the audio transmission system (see Video 2).
